1 **Orange is the new white: taxonomic revision of Antarctic *Tritonia* species (Gastropoda:**  
2 **Nudibranchia)**

3 Maria Eleonora Rossi<sup>1,2,\*</sup>: [m.eleonora.rossi@gmail.com](mailto:m.eleonora.rossi@gmail.com) | [orcid.org/0000-0002-4076-5601](https://orcid.org/0000-0002-4076-5601)

4 Conxita Avilá<sup>3</sup>: [conxita.avila@ub.edu](mailto:conxita.avila@ub.edu); [orcid.org/0000-0002-5489-8376](https://orcid.org/0000-0002-5489-8376)

5 Juan Moles<sup>4,5,6</sup>: [moles.sanchez@gmail.com](mailto:moles.sanchez@gmail.com) / [jmoles@g.harvard.edu](mailto:jmoles@g.harvard.edu) | [orcid.org/0000-0003-4511-4055](https://orcid.org/0000-0003-4511-4055)

6 <sup>1</sup>*Life Sciences Department, The Natural History Museum, Cromwell Road, London SW7 5BD, UK*

7 <sup>2</sup>*School of Biological Sciences, University of Bristol, Life Science Building, 24 Tyndall Ave, Bristol BS8 1TH, UK*

8 <sup>3</sup>*Department of Evolutionary Biology, Ecology, and Environmental Sciences, Faculty of Biology, and Biodiversity*

9 *Research Institute (IRBio), University of Barcelona, 643 Diagonal Av., 08028 Barcelona, Catalonia, Spain*

10 <sup>4</sup>*Museum of Comparative Zoology & Department of Organismic and Evolutionary Biology, Harvard University, 26*

11 *Oxford Street, Cambridge, MA 02138, USA*

12 <sup>5</sup>*Zoologische Staatssammlung München, Münchhausenstrasse 21, D-81247 München, Germany*

13 <sup>6</sup>*Biozentrum Ludwig Maximilians University and GeoBio-Center LMU Munich, Germany*

14

15 \*Corresponding author

16 **Running title: Antarctic *Tritonia* taxonomy**

17 **ABSTRACT**

18 Among nudibranch molluscs, the family Tritoniidae gathers taxa with unclear phylogenetic position, such as some species  
19 of the genus *Tritonia* Cuvier, 1798. Currently, 35 valid species belong to this genus and only three of them are found in  
20 the Southern Ocean, namely *T. challengeriana* Bergh, 1884, *T. dantarti* Ballesteros & Avila, 2006, and *T. vorax* (Odhner,  
21 1926). In this study, we shed light on the long-term discussed systematics and taxonomy of Antarctic *Tritonia* species  
22 using morpho-anatomical and molecular techniques. Samples from the Weddell Sea and Bouvet Island were dissected  
23 and prepared for scanning electron microscopy. The three molecular markers COI, 16S, and H3 were sequenced and  
24 analysed through maximum likelihood and Bayesian methods. The phylogenetic analyses and species delimitation tests  
25 clearly distinguished two species, *T. challengeriana* and *T. dantarti*, being widely-spread in the Southern Ocean, and  
26 endemic to Bouvet Island, respectively. Coloration seemed to be an unreliable character to differentiate among species  
27 since molecular data revealed both species can either have orange or white colour-morphotypes. This variability could be  
28 explained by pigment sequestration from the soft coral species they feed on. Morphological analyses reveal differences  
29 between Antarctic and Magellanic specimens of *T. challengeriana*, thus, we suggest the resurrection of *T. antarctica*  
30 Martens & Pfeffer, 1886 to encompass exclusively the Antarctic species. To progress further, additional molecular data  
31 from Magellanic specimens are required to definitely resolve their taxonomy and systematics.

32 **Key words:** Phylogenetic analyses, Southern Ocean, species delimitation tests, Tritoniidae taxonomy.

## 33 INTRODUCTION

34 The organisms composing Antarctic benthic fauna tend to present long life cycles, slow growth rates due to slow  
35 metabolism, and direct development; and this is particularly true for molluscs (Peck et al. 2006; Moles et al. 2017). All  
36 these common characteristics seem to be the consequence of the peculiar characteristics of the Southern Ocean (SO), e.g.  
37 low temperatures, relative stability in the frequency of physical disturbance, and pronounced seasonality (Dayton et al.  
38 1992; Chown et al. 2015; Riesgo et al. 2015) aided by the onset of the Antarctic Circumpolar Current (ACC), ca. 25 Mya  
39 (Beu et al. 1997). During the late Eocene glacial periods, shelf fauna was completely impoverished with some species  
40 migrating into shelters (i.e. polynyas) and deep-sea waters, these being one of the major shelters for eurybathic species  
41 during the Last Glacial Maximum (Thatje et al. 2005). Certain taxa were able to re-colonize shallow waters during  
42 interglacial periods or when iceberg scouring wrecked the benthic communities and left free space available (Thatje et al.  
43 2005). The deeper shelf of the Antarctic continent and the periodic destruction of benthic habitat on the shelf were  
44 hypothesized as natural evolutionary drivers towards eurybathy (i.e. capacity of species of living at a wide depth range),  
45 a widely shared feature of the Antarctic benthic fauna (Thatje et al. 2005; Allcock and Strugnell 2012). Numerous taxa  
46 present circum-Antarctic distributions due to the action of the ACC, the main responsible for the connectivity between  
47 populations due to the clockwise dispersion of larvae and/or adults around the SO (Thatje 2012; Riesgo et al. 2015). On  
48 the other hand, the Polar Front acts as a North-South barrier for water exchange above 1000 m depth (Clarke et al. 2005).  
49 The idea of the SO being isolated by the Polar Front has been challenged during the last years, revealing species  
50 connectivity and genetic flow with the adjacent areas (e.g. South Africa and the Magellanic region; Griffiths 2010, Chown  
51 et al. 2015).

52 Gastropods are one of the major taxa represented in the SO, with numerous species still being discovered (e.g. Moles et  
53 al. 2018, 2019; Fassio 2019; Layton et al. 2019). In the SO, nudibranchs are currently represented by less than a hundred  
54 recognized species (Moles 2016; De Broyer et al. 2019), although this species richness could increase with the application  
55 of molecular techniques. Among nudibranchs, the Dendronotida gathers several taxa with unassigned or unstable  
56 phylogenetic position (Goodheart et al. 2015). One of these taxa is the family Tritoniidae, among which the genus *Tritonia*  
57 Cuvier, 1798 appears to be the most speciose (WoRMS Editorial Board 2018). Currently, there are 35 valid species  
58 belonging to the genus *Tritonia*, and only three of them are found in the SO, with Antarctic, Sub-Antarctic, and Magellanic  
59 distributions, namely *T. dantarti* Ballesteros & Avila, 2006, *T. vorax* (Odhner, 1926), and *T. challengeriana* Bergh, 1884,  
60 respectively. *Tritonia vorax* was firstly described from South Georgia as *Duvaucelia vorax* by Odhner in 1926 and then  
61 transferred into *Tritonia* by Marcus in 1958 (Wägele 1995; Schrödl 2009). *Tritonia dantarti* was described in 2006 from  
62 Bouvet Island (Ballesteros and Avila 2006). *Tritonia challengeriana*, instead, was described for the first time in 1884 by

63 Bergh from the Magellan Strait (Bergh, 1884). Since then, the latter species has been found in South Georgia, the Falkland  
64 Islands, Tierra del Fuego, and in several Antarctic locations (Antarctic Peninsula, Ross Sea, Scotia Arc; Wägele, 1995;  
65 Schrödl, 2003). Since its first description, several nominal species have been synonymized. In Antarctica, *T. antarctica*  
66 Pfeffer in Martens & Pfeffer, 1886, was first described by Pfeffer (1886) from South Georgia, and later ascribed to *T.*  
67 *challengeriana* by Odhner (1926). Years later, Wägele (1995) differentiated between Magellanic specimens which were  
68 identified as *T. challengeriana* and specimens occurring south of the Antarctic convergence, regarded as *T. antarctica*.  
69 This was based on the presence of oral lips and the absence of mantle glands in *T. antarctica*. However, Schrödl (1996)  
70 mentioned that oral lips may also be present in *T. challengeriana* from the Chilean Patagonia. Mantle glands were found  
71 in histological sections of *T. antarctica* from South Georgia although in much lower numbers than in *T. challengeriana*  
72 from the Magellan area, and this led to synonymize again *T. antarctica* with *T. challengeriana* (Schrödl 2003). According  
73 to Schrödl (2003, 2009), there are also other described species that are no longer valid and are considered synonyms of  
74 *T. challengeriana*, i.e. *Microlophus poirieri* Rochebrune & Mabile, 1889, *T. poirieri* Odhner (1926), and *T. australis*  
75 (Berg, 1898). The specimens collected for these studies were often limited to a single individual and thus these  
76 identifications might be unreliable (Wägele, 1995; Schrödl, 2003, 2009; Shields et al. 2009). Furthermore, until now, no  
77 molecular data are available for any of these species when given the wide range of distribution that *T. challengeriana*  
78 seems to present, the implementation of molecular tools could prove helpful to solve this phylogenetic conundrum. Here,  
79 we aim to combine molecular techniques, used here for the first time in this species complex, with detailed morpho-  
80 anatomical analysis to shed light into the long-term discussed systematics and taxonomy of Antarctic *Tritonia* species.

## 81 MATERIAL AND METHODS

### 82 Sample collection

83 Specimens were collected by Agassiz trawl, bottom trawl, and Rauschert dredge at the Sub-Antarctic Bouvet Island and  
84 the eastern Weddell Sea in 1998 during the ANT XV/3 (Gutt and Arntz 1999) and in 2003–2004 during the ANT XXI/2  
85 cruises (Brey 2005) of the R/V Polarstern (Alfred Wegener Institute, Bremerhaven, Germany) (Fig. 1). The specimens of  
86 *Tritonia* spp. were collected at depths ranging from 130 to 789 m at 17 different stations (Suppl. Material 1). Specimens  
87 were photographed on board and preserved in either Karnovsky, 70% ethanol, or 10% formalin in seawater for morpho-  
88 anatomical analyses, or frozen and later transferred to 96% ethanol, for molecular analyses.

### 89 DNA amplification and extraction

90 Total genomic DNA was extracted from foot tissue with the DNeasy Tissue Kit (Qiagen, Valencia, CA, USA) following  
91 the manufacturer's protocol. Molecular markers included two fragments of the mitochondrial genes cytochrome *c* oxidase

92 I (COI) and 16S *rRNA*, and the nuclear gene *histone-3* (H3). Partial sequences of the protein-encoding COI gene were  
93 amplified using the primers LCO1490 and HCO2198 (Folmer et al. 1994), the 16S gene was amplified using 16Sar-L and  
94 16Sbr-H (Palumbi et al. 2002), and the H3 gene was amplified with H3AD5'3' and H3BD5'3' (Colgan et al. 1998). PCR  
95 amplifications were carried out in a 10  $\mu$ L-reaction including 5.1  $\mu$ L of Sigma dH<sub>2</sub>O, 3.3  $\mu$ L REDEExtract-N-Amp PCR  
96 ReadyMix (Sigma Aldrich, St. Louis, MO, USA), 0.3  $\mu$ L of each primer, and 1  $\mu$ L of genomic DNA, following standard  
97 protocols implemented in our lab (Moles et al. 2016). The PCR for COI consisted of an initial denaturation step at 95 °C  
98 for 3 min, 39 cycles of denaturation at 94 °C for 45 s, annealing at 48–50 °C for 30 s, extension at 72 °C for 2 min, and a  
99 final extending step at 72 °C for 10 min. The PCR program for 16S involved an initial denaturing step at 94 °C for 3 min,  
100 39 cycles of denaturation at 94 °C for 30 s, annealing at 44–52 °C for 30 s, extension at 72 °C for 2 min, and a final  
101 extending step at 72 °C for 10 min. For H3 amplifications we used an initial denaturation step at 94 °C for 3 min, 35  
102 amplification cycles (94 °C for 35 s, 50 °C for 1 min, and 72 °C for 1 min and 15 s), and a final extension at 72 °C for 2  
103 min. Amplified products were sequenced at the UB Scientific and Technological Centers (CCiT-UB) on an ABI 3730XL  
104 DNA Analyzer (Applied Biosystems, CA).

#### 105 **Phylogenetic analyses**

106 Chromatograms were visualized, edited, and assembled in Geneious Pro 8.1.5 (Kearse et al., 2012). To check for  
107 contamination, sequences were compared against the GenBank database using the BLAST algorithm (Basic Local  
108 Alignment Search Tool; Altschul et al. 1990, <http://www.ncbi.nlm.nih.gov>). Single gene sequences were aligned with the  
109 MUSCLE algorithm and alignments were trimmed to a position at which more than 50% of the sequences had nucleotides.  
110 Missing positions at the ends were coded as missing data. We used GBLOCKS 0.91b on the final trimmed alignment for  
111 identifying and excluding blocks of ambiguous data in the single, non-coding gene alignments of 16S, using both  
112 relaxed and stringent settings (Talavera and Castresana 2007).

113 The best-fit model of evolution (GTR +  $\Gamma$  + I; Yang 1996) was chosen using the Akaike information criterion (AIC;  
114 Posada and Buckley 2004) implemented in jModelTest 2.1.7 (Posada 2008) with the selected partition for each gene.

115 For each gene a maximum-likelihood (ML) analysis was conducted, the final result was given by a concatenated  
116 alignment of all three genes. ML analyses were conducted using RAxML 8.1.2 (Stamatakis 2014), using a GTR model  
117 of sequence evolution with corrections for a discrete gamma distribution and invariable sites (GTR +  $\Gamma$  + I; Yang 1996)  
118 was specified for each gene partition, and 500 independent searches were conducted. Nodal support was estimated  
119 through bootstrap algorithm (500 replicates) using the GTR-CAT model (Stamatakis et al. 2008). The Bayesian inference  
120 (BI) was performed on the concatenated alignment of the three genes using MrBayes 3.2.5 (Ronquist et al. 2011). Two  
121 runs were conducted in MrBayes for 10 million generations, sampling every 2,000<sup>th</sup> generation, using random starting

122 trees. A 25% of the runs were discarded as burn-in after checking for stationarity with Tracer 1.7 (Rambaut et al. 2018).  
123 Bootstrap support (BS) and posterior probabilities (PP) were thereafter mapped onto the optimal tree from the independent  
124 searches. The tree was rooted using four selected Proctonotoidea species as sister group to the rest of the Dendronotoidea  
125 species included in this study (see Goodheart et al. 2015).

#### 126 **Species delimitation tests**

127 To examine the molecular distinctiveness of the different Antarctic *Tritonia* morpho-species we used ABGD via the web  
128 interface (at <http://wwwabi.snv.jussieu.fr/public/abgd/abgdweb.html>; accessed 23<sup>rd</sup> September 2017). ABGD was run  
129 using the K80 calibrated index of genetic distance with transition/transversion ratio (TS/TV) equal to 2.0 and with a fasta  
130 file input of the COI alignment. We applied default values for  $P_{\min}$ ,  $P_{\max}$ , and the relative gap (1.0). Additionally, with the  
131 same alignment, a GMYC (Fujisawa et al. 2013) analysis was performed. The ultrametric tree, necessary for the GMYC,  
132 was generated with BEAST (Suchard et al. 2018), with GTR G+I substitution model, and lognormal relaxed clock with  
133 rate 1.0, for 10 million generations. TreeAnnotator was used to discard 25% as burn-in. The GMYC was performed on  
134 the webserver (<https://species.h-its.org/gmyc/>) with single threshold parameters.

#### 135 **Morphological analyses**

136 Photographs of whole animals were taken with a Nikon d300 Sigma 105mm f 2.8–32. Total length (L) was measured  
137 aided by a calliper. Specimens were dissected sagittally with the aid of fine forceps under a stereomicroscope. Radula and  
138 jaws were obtained from the buccal bulb after dissolving the oral bulb's soft tissue in a 10% NaOH solution for up to four  
139 hours and later rinsed with distilled water in ultrasound baths. The reproductive system was depicted, and the penial  
140 papilla extracted, and critical point dried prior to mounting on stubs with carbon sticky-tabs, as for the radulae and jaws,  
141 for scanning electron microscopy (SEM). The stubs were carbon-coated, and images were taken using a J-7100F Jeol  
142 scanning electron microscope at the UB Scientific and Technological Centers (CCiT-UB).

### 143 **RESULTS**

144 The description of the 50 specimens collected allowed us to classify them into the two known species *Tritonia*  
145 *challengeriana* and *T. dantarti*, which have been studied in detail here for their morphology and anatomy, as well as for  
146 their phylogenetic relationships.

#### 147 **Systematics**

148 Class GASTROPODA Cuvier, 1795

149 Subclass HETEROBRANCHIA Burmeister, 1837

150 Order NUDIBRANCHIA Cuvier, 1817

151 Suborder CLADOBRANCHIA William & Morton, 1984

152 Family TRITONIIDAE Lamarck, 1809

153 Genus *Tritonia* Cuvier, 1798

154 Type species: *Tritonia hombergii* Cuvier, 1803

155 ***Tritonia challengeriana* Berg, 1884**

156 (Figures 2A–G, 5A–C, 6A–F)

157 **Synonymy**

158 *Tritonia challengeriana* Bergh, 1884: 45–47, pl. 11, figs. 16–19; Eliot 1907: 354–355; 1907: 3–5; Wägele 1995: 41–  
159 45; Schrödl 2003: 97–101.

160 *Tritonia antarctica* Pfeffer in Martens & Pfeffer, 1886 112, pl. 3, figs. 6a,b; Wägele 1995: 21–46.

161 *Microlophus poirieri* Mabile & Rochebrune, 1889: 11–12, pl. 6, figs. 1a,b.

162 *Tritonia poirieri* (Mabile & Rochebrune, 1889): Wägele, 1995: 43;

163 *Candiella australis* Bergh, 1898

164 *Tritonia appendiculata* Eliot, 1905

165 *Tritonia australis* (Bergh): Dall 1909: 202.

166 *Duvaucelia challengeriana* (Bergh): Odhner, 1926: 35–37, pl. 1, fig. 14.

167 *Duvaucelia poirieri* (Rochebrune & Mabile): Odhner, 1926: 38–39

168 *Myrella poirieri* (Rochebrune & Mabile): Odhner, 1963: 51–52.

169 *Marionia cucullata* (Couthouy in Gould): Vicente & Arnaud, 1974: 539, figs. 6,7, pl. 3, figs. 1–3.

170 **Material examined:** Out of the 37 specimens collected, 32 were frozen, two were fixed in 10 % formalin in seawater,  
171 two in 70 % ethanol, and one in 96 % ethanol. South of Vestkapp, eastern Weddell Sea, 73° 36.6' S, 22°24.7' W, 736 m  
172 depth: 1 spc., dissected and sequenced, T08, L = 25 mm, barcode MN651129. Halley Bay, 74°35.8' S 26°55.0' W, 789 m  
173 depth: 1 spc., dissected and sequenced, T10, L = 22 mm, barcode MN651131. North of Kapp Norvegia, 71°07.34' S,  
174 11°27.80' W, 146 m depth: 1 spc., dissected, T25, L = 26 mm. Drescher Inlet, 72°05.18' S, 19°38.62' W, 598 m depth: 1  
175 spc., dissected T28, L = 42 mm.

176 **External morphology (Fig. 2A–C):** Body length 22–42 mm after preservation (Table 1). Body wider dorsally than  
177 ventrally. Colour of preserved specimens milky white, beige-brownish when viscera seen by transparency; live specimens  
178 homogeneously white to orange. Dorsal mantle surface smooth, with subepithelial white knobs found mostly in posterior  
179 region of mantle. White pigmentation seen on notal margin, gills, and margin of rhinophoral sheath (Fig. 2A). Rhinophoral  
180 sheath broad; margin and plumes smooth. Gills ramified, dichotomous, large or small, from 6 to 19 per side, situated in  
181 parallel to each other. Oral veil prominent, bilobed or not. Five to ten velar processes present. Mouth surrounded by thick  
182 lips without distinct oral tentacles. Foot perimeter smaller than notal surface (Fig. 2C). Genital papilla found on right side  
183 of body. Anal opening placed at ½ of body length (Fig. 2B).

184 **Digestive system (Fig. 2D– E):** Oral lips smooth, large. Oral tube short. Oral bulb and pharynx thick. Jaws yellowish,  
185 curved towards inside; several rows of conic denticles, curved, striated, as border ornaments (Fig 2D). Jaw length ranging  
186 from 5 to 9 mm. Ratio jaw:body length ranging 0.21–0.3. Radular formula 30–37 x (33–49).1.1.1.(33–49); transparent in  
187 colour. Rachidian teeth presenting median prominent cusp, one smaller cusp found per each side (Fig 2E). Two different  
188 lateral teeth, with one short, broad cusp. Oesophagus running dorsally from pharynx. Salivary glands thin, elongated,  
189 running laterally from first half of body, then ventrally following oesophagus. Stomach situated ventrally. Intestine  
190 generally striated, originating dorsally from stomach, turning right, ending in anal opening.

191 **Reproductive system (Fig. 2F–G):** Reproductive system androdiaulic. Gonad large, wrinkled, covering digestive gland  
192 posteriorly. Gonoduct opening in ampulla connected by spermiduct to vas deferens. Bifurcation into vas deferens and  
193 oviduct not easily detected (Fig. 2F). Penial sheath terminal, conical, thin; penial papilla conical, slightly twisted (Fig.  
194 2G). Seminal receptacle voluminous, with short duct; going shortly into genital opening. Granulated capsule gland at  
195 bottom of wide mucous gland, preceding short oviduct.

196 **Ecology:** The specimens were collected from 146 to 789 m depth. Sclerites of alcyonarian octocorals were found in the  
197 gut contents of the three specimens studied (Fig.5 B–D).



198 **Distribution:** Argentinian Patagonia (Marcus et al. 1969), Falkland Islands (Eliot 1907), Chilean Patagonia (Bergh 1884;  
199 Schrödl 1996) to Ancud Bay (Schrödl 1996), South Georgia (Odhner 1926), Adélie Land (Vicente and Arnaud 1994),  
200 Victoria Land (Ross Sea, Schiaparelli et al. 2006), eastern Weddell Sea (Wägele 1995; this study).

201 **Remarks:** Most synonyms of genera and species to *T. challengeriana* were based on external morphological similarities  
202 (Wägele 1995; Schrödl 2003). For instance, Mabile and Rochebrune (1889) described *Microlophus poirieri* from  
203 Patagonia, Falkland Islands, and South Georgia, based only on their external morphology and colouration. This was later  
204 synonymized to *T. challengeriana* by Wägele (1995) based on their external morphology. *Marionia cucullata* was  
205 described from Adélie Land (Vicente and Arnaud, 1974). The similarity in oral lips' shape and the low number of gills  
206 allowed Wägele (1995) to synonymize this genus and species to *T. antarctica*. *Tritonia appendiculata* Eliot, 1905 was  
207 described from Harbour of South Orkney, Scotia Bay, at 16 m depth. Its body colour was greenish-yellow, this is the only  
208 character that clearly differs from our specimens, since most of the morphological characters overlap with *T.*  
209 *challengeriana*. For instance, the species presents 19 gills per side and, on the dorsal surface, sub-epithelial knobs  
210 organized as “warts” were present (Eliot 1905). The oral veil presents twelve simple digitate processes and the lips are  
211 projected on each side of the mouth. The relation of jaw length (10 mm) to body length (51.5 mm) is 0.19 for *T.*  
212 *appendiculata*, while Wägele (1995) found a similar ratio for *T. challengeriana* 0.23, as in our study, thus our data support  
213 Wägele's synonymy. *Tritonia poirieri* Mabile & Rochebrune, 1891, det. Odhner 1926, was found at Fitzroy Channel, at  
214 14 m depth. The species body shape resembles that of *Doris*, with the notal margin bent downward. Other than the peculiar  
215 body shape, there were not enough differences to clearly identify *T. poirieri* as a distinct species from *T. challengeriana*  
216 (Wägele 1995).

217 Wägele (1995) differentiated Magellanic specimens of *T. challengeriana* from the specimens occurring south of the Polar  
218 Front, regarded as *T. antarctica* Martens & Pfeffer, 1886. The major difference was the presence of oral lips and mantle  
219 glands, exclusively found in *T. antarctica*. Later on, Schrödl (2003) described these two characters in *T. challengeriana*  
220 from Chilean Patagonia and synonymized it to *T. antarctica*. Our specimens are morphologically similar to the *T.*  
221 *antarctica* specimens described by Wägele (1995), with visible white knobs on the dorsal surface of the body and the  
222 presence of conspicuous oral lips. In fact, our description of *T. challengeriana* overlaps with the measurements and  
223 descriptions from Pfeffer (1886) and Wägele (1995), thus highlighting a major similarity to *T. antarctica* than to the  
224 Magellanic *T. challengeriana*. On the other hand, *Tritonia vorax* (Odhner, 1926) is found in South Georgia (Wägele  
225 1995), Burdwood Bank, and the Chilean Patagonia (Odhner 1926; Schrödl 1996). Living specimens present a whitish to  
226 brownish colouration, with white or opaque white reticulations on the notal surface. Preserved specimens can be whitish,  
227 yellowish or pinkish and their notum can be more or less smooth. This species differs from *T. challengeriana* by having

228 less number of gills, extremely large and strong jaws, which cause an elevated mediodorsal protuberance in between the  
229 rhinophores, and the lack of oral lips, with a higher jaws:body length ratio than *T. challengeriana* (Table 1). Differences  
230 between *T. challengeriana* and *T. dantarti* are discussed in the Remarks section below.

231 ***Tritonia dantarti* Ballesteros & Avila, 2006**

232 (Figures 3A–G, 5D–E, 7A–B)

233 **Material examined:** Thirteen specimens collected at stations PS65/028-1 and PS65/029-1 in Bouvet Island. Six  
234 specimens were fixed in 70% ethanol, four were frozen, one in 96% ethanol, and two in Karnovsky. Bouvet Island, 54°  
235 30.1' S, 3°13.97' W, 260 m depth: 1 spc, dissected and sequenced, T14.3, L = 18 mm, barcode MN651134; 54° 22.49' S,  
236 3°17.58' W, 130 m depth: 1 spc, dissected, T16, L = 23 mm; 54° 22.49' S, 3°17.58' W, 130 m depth: 1 spc, dissected,  
237 T18.1, L = 20 mm, barcode.

238 **External morphology (Fig. 3A–C):** Body short, thick; 18–23 mm length. Colour beige to milky white in preserved  
239 specimens, living specimens sometimes completely white (Fig. 8A) or bright orange on dorsal surface, with warts forming  
240 a reticulation; white laterally (Fig. 8B). Dorsal mantle surface smooth with subepithelial white knobs. Notal margin  
241 unpigmented. Rhinophores with large sheath; smooth margin with emerging plumes. Single small gills or largely ramified,  
242 from 15 to 29 per side (Fig. 3A). Oral veil not prominent, bilobed or not; velar processes, short, nine to 19 in number.  
243 Lips thick, surrounding buccal bulb, without recognizable tentacles. Foot narrower than notum (Fig. 3C). Genital papilla  
244 on right side at 1/3 of body length. Anal opening at 1/2 of body length (Fig. 3B). Length and morphometrical data reported  
245 in Table 1.

246 **Digestive system (Fig. 3D–E):** Oral lips thick, smooth. Pharynx large, compact; hosting a pair of curved jaws, with a  
247 yellowish margin. Jaw denticles broad, conical, striated, hooked on top, arranged in several rows (Fig 3D). Jaw length  
248 ranging 5–6.5 mm. Jaw:body length ratio ranging from 0.25 to 0.28. Rachidian teeth broad, monocuspdated (Fig. 3E).  
249 Radular formula: 36–37 x (43–46)1.1.1.(43–46). Oesophagus running dorsally from pharynx. Salivary glands large,  
250 isodiametric, running laterally in first body half, then ventrally under oesophagus. Stomach situated ventrally. Intestine  
251 generally striated, originating dorsally from stomach, turning to right side, ending at anal opening.

252 **Reproductive system (Fig 3F–G):** Reproductive system situated between buccal bulb and digestive gland. Gonad  
253 brownish, warty, covering digestive gland. Genital papilla opening in ampulla, spermiduct could not be observed (Fig.  
254 3F). Seminal receptacle wide. Penis thin, flagellated (Fig. 3G), occasionally conical. Penial papilla with conical shape.

255 Mucus gland well developed, situated on top of entire system; granulated capsule gland preceding short oviduct, often  
256 convoluted.

257 **Ecology:** Specimens of *T. dantarti* were collected on Bouvet Island at 130–134 m depth, in sea bottoms dominated by  
258 ophiuroids (e.g., *Ophionotus victoriae*), sea stars (*Porania antarctica*), holothuroids, sedentary polychaetes, hydroids,  
259 alcyonarians, different actinian species, amphipods, and pycnogonids. Gut contents showed that *T. dantarti* feeds on  
260 alcyonarians of the genus *Alcyonium* (Fig. 5A, 5E).

261 **Distribution:** Northwest and southeast of Bouvet Island.

262 **Remarks:** *Tritonia dantarti* is clearly distinguished from its counterpart *T. vorax* by the possession of oral lips, completely  
263 lacking in *T. vorax*. In *T. dantarti* the oral veil can be bilobed or not, while it is always bilobed in *T. vorax*. Moreover, *T.*  
264 *dantarti* presents lesser teeth rows and a monocuspidated rachidian tooth, while *T. vorax* presents a higher number of  
265 rows with a tricuspidated rachidian tooth. Additionally, the jaws:body length ratio is higher in *T. vorax* (Table 1).

266 *Tritonia dantarti* was described by possessing a conspicuous orange colouration in the dorsum of living specimens (see  
267 Fig. 6a,c,e in Ballesteros and Avila 2006; Fig. 7B in this study). This was, in fact, the main difference from *T.*  
268 *challengeriana*, but here molecular evidence of both white and orange colour-morphs is given for *T. dantarti* (see below).  
269 An additional diagnostic character is the presence of a warty reticulation in the notal surface of living specimens of *T.*  
270 *dantarti*, which has not been obviously observed in our preserved specimens, and is completely missing in *T.*  
271 *challengeriana*. Moreover, *T. challengeriana* generally presents fewer velar processes and fewer clusters of gills, but  
272 some overlap exists for both species, and a broad range of morphological differences are especially misleading in  
273 preserved specimens of both species. Our results agree with previous descriptions for both species (Wägele, 1995;  
274 Schrödl, 2003; Ballesteros and Avila, 2006).

## 275 **Phylogenetic analyses**

276 The total dataset contained 41 specimens of *Tritonia* and 17 closely related outgroup taxa (Suppl. Material 2). The  
277 concatenated alignment consisted of 1,415 characters, including COI with 3<sup>rd</sup> codon position (ca. 601 bp), 16S unmodified  
278 (ca. 486 bp), and H3 with 3<sup>rd</sup> codon position (ca. 328 bp). The best-fit evolutionary models and parameters were calculated  
279 by jModeltest and Gblocks (Suppl. Material 3).

280 ML and BI analyses recovered a tree with maximum support for both *T. challengeriana* specimens from the Weddell Sea  
281 and the only sequenced specimen from the Ross Sea (PP = 1, BS = 100), and for *T. dantarti* including only the Sub-

282 Antarctic specimens from Bouvet Island (PP = 1, BS = 98; Fig. 4). The GenBank specimen labelled as *T. antarctica*  
283 (voucher number CASIZ171177) clusters here with our specimens of *T. dantarti*, and thus might be considered a  
284 missidentification. Sister to both SO species sequenced we found the North Pacific *T. festiva*. The SO species clustered  
285 in a clade with highly supported clusters of different *Tritonia* species. We recovered the unidentified *Tritonia* sp. 3,  
286 *Tritonia* sp. 6, *Tritonia* sp. 7, and *Tritonia* sp. G all in a well-supported clade with all sequenced *Marionia* species. The  
287 relationships of the Antarctic monotypic *Tritoniella belli* were not clearly found in our analyses. The relationship among  
288 *Bornella*, *Marionia*, *Tritoniella*, and *Tritonia* clades was not recovered in this study.

289 The ABGD analyses additionally supported the taxonomic classification of *T. challengeriana* and *T. dantarti* with an  
290 intraspecific variation of 1.7 and 1.9 % on average, respectively; whereas their interspecific variation ranged from 12 to  
291 14 %. Intraspecific variation within other *Tritonia* species considered in this study range from 0 to 7 %, while their  
292 interspecific variations ranges approx. 9.1–25.7 % (Table 2). We have chosen to not consider in this species delimitation  
293 tests, the unidentified *Tritonia* spp. (Sup. Material 2) due to a possible misinterpretation of the specimens, that may belong  
294 to the genus *Marionia* (Fig. 4). The GMYC analysis also recovers two distinct species groups belonging to *T.*  
295 *challengeriana* and *T. dantarti*, in accordance to the ABGD and the phylogenetic tree (Suppl. Material 4).

## 296 **DISCUSSION**

### 297 **Taxonomy and morphology of Antarctic *Tritonia* species**

298 The specimens analysed in this study from the high Antarctic belonged to the only current valid species *Tritonia*  
299 *challengeriana*, while the specimens from Bouvet Island belonged to *T. dantarti*. Phylogenetic analyses and species  
300 delimitation tests recovered these two species with a strong support (Fig. 4), including the specimens of *T. challengeriana*  
301 from the Weddell Sea and the only sequenced specimen from the Ross Sea (PP = 1, BS = 100), and the specimens of *T.*  
302 *dantarti* from Bouvet Island (PP = 1, BS = 98). Morpho-anatomical analyses showed that, on the dorsal body surface in  
303 living specimens of *T. dantarti* warts and reticulation are visible. Nonetheless, the bright orange colouration (Ballesteros  
304 and Avila 2006) may no longer be a valid diagnostic character, since both milky-white and orange colour-morphotypes  
305 from Bouvet Island were found here, as it has been described for *T. challengeriana* from both South America and high  
306 Antarctic regions (Figs. 5–6). These results were supported for our molecular analyses. Besides this, no other clear  
307 diagnostic characters were found in the morpho-anatomical analyses to allow the discrimination among these two species.  
308 For instance, shape and body measurements, the number of velar processes, the shape and number of gills, the radular  
309 formula, and the shape of the jaws are not quite discernible between *T. dantarti* and *T. challengeriana*. In fact, both  
310 species overlap in the range of the aforementioned characters (Table 1), as also reported by Wägele (1995), Schrödl

311 (2003), and Ballesteros and Avila (2006). Nonetheless, *T. challengeriana* seems to present lesser oral tentacles and gill  
312 clusters than *T. dantarti*, but still this might be subjected to ontogenetic development

313 The validity of *T. antarctica* has been questioned in a few studies (see remarks section of *T. challengeriana*). Wägele  
314 (1995) sustained the existence of *T. antarctica* for the presence, in Antarctic specimens, of subepithelial glands (externally  
315 visualized as knobs), which were lacking in Magellanic specimens. Later on, Schrödl (2003) suggested the contrary,  
316 showing that the glands were present on the dorsal surface of the specimens from the Magellanic area, even if sporadically  
317 and in a lower number. Our specimens seem to be similar to the *T. antarctica* described by Wägele (1995). Pictures of  
318 living specimens from the Magellanic region (Fig. 6A–C) do not show visible knobs, which are easily detectable on  
319 specimens from Antarctica (Fig. 6D–F). Unfortunately, we cannot confirm the validity of *T. antarctica*, since there are  
320 no molecular data available for *T. challengeriana* from the Magellanic region to date. Southern American material and  
321 additional samples from around Antarctica could be very useful to shed light into the Southern Hemisphere *Tritonia*  
322 species systematics. However, the morphological analysis suggests that *T. challengeriana* and *T. antarctica* could be  
323 considered to be different species, given the evidence of the visible knobs on the dorsal surface present on Antarctic  
324 specimens.

### 325 **The colouration issue**

326 Members of the family Tritoniidae feed almost exclusively on octocorals, including sea pens, alcyonarian soft corals, and  
327 gorgonians, sometimes being cryptic in shape and colouration upon them (García-Matucheski and Muniain 2011). In the  
328 SO, *Tritonia* species feed mostly on alcyonarian soft corals (Schrödl 2003; Wägele 1995; García-Matucheski and Muniain  
329 2011). Here, we found soft-coral sclerites in the gut contents of both *T. challengeriana* and *T. dantarti*. The *Alcyonium*  
330 species living in the SO are *A. antarcticum* Wright & Studer, 1889, *A. grandis* Casas, Ramil & van Ofwegen, 1997, *A.*  
331 *haddoni* Wright & Studer, 1889, *A. paucilobatum* Casas, Ramil & van Ofwegen, 1997, *A. sollasi* Wright & Studer, 1889,  
332 and *A. southgeorgensis* Casas, Ramil & van Ofwegen, 1997, and they can all present a yellow, cream or orange  
333 colouration, while they tend to be brighter in the Magellanic region (Casas et al. 1997). Through evolution, and related to  
334 the loss of the shell, nudibranchs have developed a plethora of defensive strategies against predators (Avila et al. 2018).  
335 These defences include chemicals (natural products), which can be either *de novo* synthesized by the own slug or gathered  
336 from their prey (*i.e.* kleptochemistry). An example of kleptochemistry in Antarctica is found in *Tritoniella belli* Eliot,  
337 1907 which obtains its defensive natural products from its prey, the anthozoan *Clavularia frankliniana* Roule, 1902  
338 (McClintock et al. 1994). Some dietary metabolites can be brightly coloured pigments, as for some *Alcyonium* spp. natural  
339 products (Abdel-Lateff et al. 2019), and these may provide an additional mimetic defensive strategy on top of the chemical

340 deterrence of the slug. Although the development of a bright colouration may sometimes represent a warning mechanism  
341 (i.e. aposematism; Aguado and Marin 2007; Haber et al. 2010; Avila et al. 2018), the bright orange colouration found in  
342 both *T. challengeriana* and in *T. dantarti* may not represent an aposematism mechanism, since the majority of visually  
343 guided predators, such as fishes or decapods, are not especially diversified in Antarctica (De Broyer et al. 2011; discussed  
344 in Moles 2016). Nevertheless, some evidence is given for the defensive nature against sympatric sea star predators of *T.*  
345 *challengeriana*, although the compounds have not been identified yet (Avila et al. 2018). This strategy has been proved  
346 in other Antarctic species, such as *Bathydoris hodgsoni* Eliot, 1907 and *T. belli* (McClintock et al. 1994; Avila et al.  
347 2000). We propose here that the colouration in *T. challengeriana* and *T. dantarti* varies locally, in direct relation to diet,  
348 and therefore cannot be used as a diagnostic character for these species.

### 349 **Distribution and cryptic speciation**

350 From our molecular analyses, while *T. dantarti* seems to have a restricted, endemic distribution in Bouvet Island, *T.*  
351 *challengeriana* seems to present a disjunct (i.e. found in both the Weddell and Ross seas) and probably circumpolar  
352 distribution. This distribution could be partially explained by the action of the ACC (Thatje 2012). When the Drake  
353 Passage was narrower, the ACC flow was particularly intense in the Antarctic region, carrying adults or egg masses  
354 attached to floating debris (i.e. rafting phenomenon) to new habitats all around Antarctica (i.e. circumpolar distribution),  
355 where they could, through genetic drift and selection (Allcock and Strugnell 2012), diverge sufficiently to either yield a  
356 new species by allopatric speciation – which might have been the case for the restricted *T. dantarti* – or widening its  
357 geographical range, as for *T. challengeriana*. Even if the rafting phenomenon allowed a long-distance dispersal in  
358 organisms that not produce free-swimming larvae (Thatje 2012) during glacial cycles, the existence of polynyas, i.e.  
359 shelters and regions where the ice shelf did not cover homogeneously the shelf, acted as refugia (Thatje et al. 2005; Fraser  
360 et al. 2014; Chown et al. 2015) and species may have gone through a process of isolation, which led to cryptic speciation  
361 (Wilson et al. 2009). In fact, because of the existence of cryptic species, the current species richness of gastropods in the  
362 Antarctic and Sub-Antarctic regions is higher than previously thought (Linse et al. 2007). Likewise, new cephalaspidean  
363 molluscs with low character displacement have been recently described based on molecular data in the same region (Moles  
364 et al. 2017, 2019). The nudibranch *D. kerguelenensis* seems to also present this trend; molecular data evidenced a complex  
365 genetic structure that suggests much diversity than a single recognised species (Wilson et al. 2009). This hypothesis is  
366 corroborated by the wide variety of natural products used against predators, but due to the lack of morphological analyses  
367 the taxonomy of *D. kerguelenensis* is still not solved (Wilson et al. 2013). Both *T. challengeriana* and *T. dantarti* are  
368 clearly two different species, but the relationship between *T. challengeriana* specimens from the Antarctic and the  
369 Magellanic regions remains still unclear, thus the validity of the *T. antarctica* requires further systematic work. Additional

370 samples from other locations in Antarctica, Sub-Antarctic Islands, and South America are urgently needed to shed light  
371 on the systematics of the group. Sampling in poorly known areas of the SO, such as the Amundsen Sea or the western  
372 Weddell Sea, and the continental shelves underneath floating ice shelves (Griffiths 2010), with the increasing application  
373 of molecular techniques and complementary molecular markers with higher resolution (e.g. EPIC markers,  
374 microsatellites, and/or genome- or transcriptome-derived SNPs; Riesgo et al. 2015; Moles et al. 2019) are required to  
375 further evaluate cryptic speciation and increasing our knowledge on the biodiversity of most invertebrate taxa in the SO.



376 **ACKNOWLEDGMENTS**

377 We are indebted to Prof W. Arntz, T. Brey, and the crew of R/V Polarstern, for allowing the participation of C. Avila in  
378 the Antarctic cruises ANT XV/3 and ANT XXI/2 (AWI, Bremerhaven, Germany). E. Prats (CCiT-UB, Barcelona, Spain)  
379 is acknowledged for her help during the SEM sessions. We also thank M. Ballesteros, P. Brueggeman, G. Giribet, S.  
380 Harper, T. Heran, and D. Thompson for kindly providing the pictures of the live animals. Funding was provided by the  
381 Spanish government through the ECOQUIM (REN2003-00545, REN2002-12006-E ANT) and DISTANTCOM  
382 (CTM2013-42667/ANT) Projects. M.E. Rossi was supported by an Erasmus + grant from La Sapienza, University of  
383 Rome, at the University of Barcelona. This paper is part of the AntEco (State of the Antarctic Ecosystem) Scientific  
384 Research Programme.

385

386 **CONFLICT OF INTEREST:** The authors declare that they have no conflict of interest.

387



388 **REFERENCES**

- 389 Aguado, F. and Marin, A. (2007). Warning coloration associated with nematocyst-based defences in aeolidioid nudibranchs. *Journal of Molluscan Studies*, 73(1), 23–28.
- 391 Allcock, A.L. and Strugnell, J.M. (2012). Southern Ocean diversity: New paradigms from molecular ecology. *Trends in Ecology and Evolution*, 27(9), 520–528.
- 393 Altschul, S.F., Gish, W., Miller, W., Myers, E.W. and Lipman, D.J. (1990). Basic local alignment search tool. *Journal of Molecular Biology*, 215, 403–410.
- 395 Arntz, W. and Gutt, J., (1999). The expedition ANTARKTIS XV/3 (EASIZ II) of RV" Polarstern" in 1998. *Berichte zur Polarforschung (Reports on Polar Research)*, 301.
- 397 Arntz, W. and Brey, T. (2005). The expedition ANTARKTIS XXI/2 (BENDEX) of RV" Polarstern" in 2003/2004. *Berichte zur Polar-und Meeresforschung (Reports on Polar and Marine Research)*, 503.
- 399 Arntz, W.E., Thatje, S., Linse, K., Avila, C., Ballesteros, M., Barnes, D.K., Cope, T., Cristobo, F.J., De Broyer, C., Gutt, J. and Isla, E. (2006). Missing link in the Southern Ocean: sampling the marine benthic fauna of remote Bouvet Island. *Polar Biology*, 29 (2), 83–96.
- 402 Avila, C., Iken, K., Fontana, A. and Cimino, G. (2000). Chemical ecology of the Antarctic nudibranch *Bathydoris hodgsoni* Eliot, 1907: defensive role and origin of its natural products. *Journal of Experimental Marine Biology and Ecology*, 252(1), 27–44.
- 405 Avila, C., Taboada, S. and Núñez-Pons, L. (2008). Antarctic marine chemical ecology: what is next?. *Marine Ecology*, 29(1), 1–71.
- 407 Avila, C., Núñez-Pons, L. and Moles, J. (2018). From the Tropics to the Poles: chemical defense strategies in sea slugs (Mollusca: Heterobranchia). In: Puglisi MP, Becerro MA, editors. *Chemical ecology: the ecological impacts of marine natural products* (pp. 71–163). Boca Raton, CRC Press.
- 410 Ballesteros, M. and Avila, C. (2006). A new tritoniid species (Mollusca: Opisthobranchia) from Bouvet Island. *Polar Biology*, 29(2), 128–136.
- 412 Beu, A G., Griffin, M. and Maxwell, P. A. (1997). Opening of Drake Passage gateway and Late Miocene to Pleistocene cooling reflected in Southern Ocean molluscan dispersal: evidence from New Zealand and Argentina. *Tectonophysics*, 281(1–2), 83–97.
- 415 Casas, C., Ramil, F. and van Ofwegen, L.P. (1997). Octocorallia (Cnidaria: Anthozoa) from the Scotia Arc, South Atlantic Ocean: The genus *Alcyonium* Linnaeus, 1758. *Zoologische Mededelingen*, 71(26), 299–311.
- 417 Chown, S.L., Clarke, A., Fraser, C.I., Cary, S.C., Moon, K.L. and McGeoch, M.A. (2015). The changing form of Antarctic biodiversity. *Nature*, 522(7557), 431.
- 419 Dall, W.H. (1909). Report on a collection of shells from Peru, with a summary of the littoral marine Mollusca of the Peruvian Zoological Province. *Proceedings of the U. S. National Museum* 37, 147–294.
- 421 Dayton PK, Mordida BJ, Bacon F (1994) Polar marine communities. *American Zoologist* 34, 90–99.
- 422 De Broyer, C. and Danis, B., 2011. How many species in the Southern Ocean? Towards a dynamic inventory of the Antarctic marine species. *Deep sea research Part II: Topical studies in oceanography*, 58(1-2), pp.5-17.
- 424 De Broyer, C., Clarke, A., Koubbi, P., Pakhomov, E., Scott, F., Vanden Berghe, W. & Danis, B. 2019. The SCAR-MarBIN Register of Antarctic Marine Species (RAMS), [06/04/2016]. World Wide Web electronic publication. Available online at <http://www.scarmarbin.be/scarramsabout.php>.
- 427 Eliot, C. 1905. The Nudibranchiata of the Scottish National Antarctic Expedition. *Transactions of the Royal Society of Edinburgh*, 41, 519–532.
- 429 Eliot, C. (1907). Nudibranchs from New Zealand and the Falkland Islands. *Proceedings of the Malacological Society of London*, 7, 350–361.
- 431 Fassio, G., Modica, M.V., Alvaro, M.C., Buge, B., Salvi, D., Oliverio, M. and Schiaparelli, S., (2019). An Antarctic flock under the Thorson's rule: Diversity and larval development of Antarctic Velutinidae (Mollusca: Gastropoda). *Molecular Phylogenetics and Evolution*, 132, 1–13.
- 434 Fraser, C.I., Terauds, A., Smellie, J., Convey, P. and Chown, S.L. (2014). Geothermal activity helps life survive glacial cycles. *Proceedings of the National Academy of Sciences*, 111(15), 5634–5639.
- 436 García-Matucheski, S. and Muniain, C. (2011). Predation by the nudibranch *Tritonia odhneri* (Opisthobranchia: Tritoniidae) on octocorals from the South Atlantic Ocean. *Marine Biodiversity*, 41(2), 287–297.
- 438 Goodheart, J.A., Bazinet, A.L., Collins, A.G., and Cummings, M.P. (2015). Relationships within Cladobranchia (Gastropoda: Nudibranchia) based on RNA-Seq data: an initial investigation. *Royal Society Open Science*, 2(9), 150196.
- 441 Griffiths, H. J. (2010). Antarctic marine biodiversity—what do we know about the distribution of life in the Southern Ocean?. *PloS ONE*, 5(8), e11683.
- 443 Griffiths, H., and Grant, S. A. (2014). Biogeographic atlas of the Southern Ocean. C. De Broyer, and P. Koubbi (Eds.). Cambridge: Scientific Committee on Antarctic Research.
- 444

- 445 Haber, M., Cerfeda, S., Carbone, M., Calado, G., Gaspar, H., Neves, R., Maharajan, V., Cimino, G., Gavagnin, M.,  
446 Ghiselin, M.T. and Mollo, E. (2010). Coloration and defense in the nudibranch gastropod *Hypselodoris fontandraui*.  
447 *The Biological Bulletin*, 218(2), 181–18.
- 448 Jörger, K.M., Schrödl, M., Schwabe, E. and Würzberg, L. (2014). A glimpse into the deep of the Antarctic Polar Front–  
449 Diversity and abundance of abyssal molluscs. *Deep Sea Research Part II: Topical Studies in Oceanography*, 108,  
450 93–100.
- 451 Jossart, Q., Moreau, C., Agüera, A., De Broyer, C. and Danis, B. (2015). The Register of Antarctic Marine Species  
452 (RAMS): a ten-year appraisal. *ZooKeys*, 2015(524), 137–145.
- 453 Kearse, M., Moir, R., Wilson, A., Stones-Havas, S., Cheung, M., Sturrock, S., Buxton, S., Cooper, A., Markowitz, S.,  
454 Duran, C., Thierer, T., Ashton, B., Mentjies, P., and Drummond, A. (2012). Geneious Basic: an integrated and  
455 extendable desktop software platform for the organization and analysis of sequence data. *Bioinformatics*, 28(12),  
456 1647–1649.
- 457 Layton, K. K., Rouse, G. W., & Wilson, N. G. (2019). A newly discovered radiation of endoparasitic gastropods and  
458 their coevolution with asteroid hosts in Antarctica. *BMC evolutionary biology*, 19(1), 180.
- 459 Lin, C.P. and Danforth, B.N. 2004. How do insect nuclear and mitochondrial gene substitution patterns differ? Insights  
460 from Bayesian analyses of combined datasets. *Molecular Phylogenetics and Evolution*, 30(3), 686–702.
- 461 Linse, K., Cope, T., Lörz, A.N. and Sands, C. (2007). Is the Scotia Sea a centre of Antarctic marine diversification? Some  
462 evidence of cryptic speciation in the circum-Antarctic bivalve *Lissarca notorcadensis* (Arcoidea: Philobryidae).  
463 *Polar Biology*, 30(8), 1059–1068.
- 464 Marcus, E. (1959). Lainelliariacea and Opisthobranchia. *Reports of the Lund University Chile Expedition*, 55(9), 1–133.
- 465 Marcus, E.D.B.R., Marcus, E. and Kirsteuer, E. (1969). Opisthobranchian and lamellarian gastropods collected by the"  
466 Vema". *American Museum Novitates*, 2368.
- 467 McClintock, J.B., Baker, B.J., Slattery, M., Heine, J.N., Bryan, P.J., Yoshida, W., Davies-Coleman, M.T. and Faulkner,  
468 D.J. (1994). Chemical defense of common Antarctic shallow-water nudibranch *Tritoniella belli*, Eliot (Mollusca:  
469 Tritoniidae) and its prey, *Clavularia frankliniana*, Rouel (Cnidaria: Octocorallia). *Journal of Chemical Ecology*, 20,  
470 3361.
- 471 Moles, J. (2016). Antarctic heterobranch molluscs: diving into their challenging ecology, taxonomy, and systematics.  
472 Doctoral thesis, Universitat de Barcelona.
- 473 Moles, J., Wägele, H., Ballesteros, M., Pujals, Á., Uhl, G. and Avila, C. (2016). The end of the cold loneliness: 3D  
474 comparison between *Doto antarctica* and a new sympatric species of *Doto* (Heterobranchia: Nudibranchia). *PLoS*  
475 *ONE*, 11, e0157941.
- 476 Moles, J., Wägele, H., Cutignano, A., Fontana, A., Ballesteros, M. and Avila, C. (2017). Giant embryos and hatchlings  
477 of Antarctic nudibranchs (Mollusca: Gastropoda: Heterobranchia). *Marine Biology*, 164(5), 114.
- 478 Moles, J., Avila, C. and Malaquias, M. A. E. (2018). Systematic revision of the Antarctic gastropod family Newnesiidae  
479 (Heterobranchia: Cephalaspidea) with the description of a new genus and a new abyssal species. *Zoological Journal*  
480 *of the Linnean Society*, 183(4), 763–775.
- 481 Moles, J., Avila, C. and Malaquias, M. A. E. (2019). Unmasking Antarctic mollusc lineages: novel evidence from  
482 philinoid snails (Gastropoda: Cephalaspidea). *Cladistics*, 35(5), 487–513.
- 483 Odhner, N.H.J. 1926. The Opisthobranchien (Vol. 2, No. 1). PA Norstedt & Söner.
- 484 Odhner N.H.J. (1936). Nudibranchia, Dendronotacea; A revision of the system. *Mémoires du Musée Royal l'Histoire*  
485 *Naturelle de Belgique*, 2, 1056–1128.
- 486 Odhner, N.H.J. 1963. On the taxonomy of the family Tritoniidae (Mollusca: Opisthobranchia). *Veliger*, 6, 48–52.
- 487 Peck LS, Clarke A, Chapman AL (2006) Metabolism and development of pelagic larvae of Antarctic gastropods with  
488 mixed reproductive strategies. *Marine Ecology Progress Series*, 318, 213–220.
- 489 Posada, D. and Buckley, T.R. (2004). Model selection and model averaging in phylogenetics: advantages of Akaike  
490 information criterion and Bayesian approaches over likelihood ratio tests. *Systematic Biology*, 53(5), 793–808.
- 491 Posada, D. (2008). jModelTest: phylogenetic model averaging. *Molecular Biology and Evolution*, 25(7), 1253–1256.
- 492 Pulliandre, N., Lambert, A., Brouillet, S. and Achaz, G. (2011). ABGD, Automated Barcode Gap Discovery for primary  
493 species delineation. *Molecular Ecology*, 21, 1864–1877.
- 494 Rambaut, A., Drummond, A.J., Xie, D., Baele, G. and Suchard, M.A. (2018). Tracer v1.7, Available from  
495 <http://tree.bio.ed.ac.uk/software/tracer/>
- 496 Riesgo, A., Taboada, S. and Avila, C. (2015). Evolutionary patterns in Antarctic marine invertebrates: an update on  
497 molecular studies. *Marine Genomics*, 23, 1–13.
- 498 Rochebrune, A.T. and de Mabile, J. (1889). Mollusques. Mission Scientifique du Cap Horn 1882–1883. Tome 6  
499 (Zoologie 2, part 8). *Paris, Gauthiers-Villars*, pls. 1–8, 11–12.

- 500 Ronquist, F., Huelsenbeck, J. and Teslenko, M. (2011). Draft MrBayes version 3.2 manual: tutorials and model  
501 summaries. Distributed with the software from <http://brahms.biology.rochester.edu/software.html>
- 502 Schiaparelli, S., Lörz, A.N. and Cattaneo-Vietti, R. (2006). Diversity and distribution of mollusc assemblages on the  
503 Victoria Land coast and the Balleny Islands, Ross Sea, Antarctica. *Antarctic Science*, 18(4), 615–631.
- 504 Schrödl, M., (1996). Nudibranchia y Sacoglossa de Chile: Morfología exterior y distribución. *Gayana Zoología*, 60, 17–  
505 62.
- 506 Schrödl, M., 2003. Sea slugs of Southern South America. 165.
- 507 Schrödl, M. (2009). Opisthobranchia - Sea Slugs. *Marine Benthic Fauna of Chilean Patagonia*, 505–542.
- 508 Schrödl, M., Jörger, K.M., Klussmann-Kolb, A. and Wilson, N.G. (2011). Bye bye “Opisthobranchia”! A review on the  
509 contribution of mesopsammitic sea slugs to euthyneuran systematics. *Thalassas*, 27(2), 101–112.
- 510
- 511 Stamatakis, A., Hoover, P. and Rougemont, J. (2008). A rapid bootstrap algorithm for the RAxML web servers.  
512 *Systematic Biology*, 57(5), 758–771.
- 513 Stamatakis, A. (2014). RAxML version 8: a tool for phylogenetic analysis and post-analysis of large phylogenies.  
514 *Bioinformatics*, 30(9), 1312–1313.
- 515 Suchard, M.A., Lemey, P., Baele, G., Ayres, D.L., Drummond, A.J. and Rambaut, A. (2018). Bayesian phylogenetic and  
516 phylodynamic data integration using BEAST 1.10 *Virus Evolution* 4, vey016.
- 517 Talavera, G. and Castresana, J. (2007). Improvement of phylogenies after removing divergent and ambiguously aligned  
518 blocks from protein sequence alignments. *Systematic Biology*, 56(4), 564–577.
- 519 Thatje, S., Hillenbrand, C.D. and Larter, R. (2005). On the origin of Antarctic marine benthic community structure. *Trends*  
520 *in Ecology and Evolution*, 20(10), 534–540.
- 521 Thatje, S. (2012). Effects of capability for dispersal on the evolution of diversity in Antarctic benthos. *Integrative and*  
522 *Comparative Biology*, 52(4), 470–482.
- 523 Fujisawa, T. and Barraclough, T.G., (2013). Delimiting species using single-locus data and the Generalized Mixed Yule  
524 Coalescent approach: a revised method and evaluation on simulated data sets. *Systematic Biology*, 62(5), 707–724.
- 525 Wägele, H. (1995). The morphology and taxonomy of the Antarctic species of *Tritonia* Cuvier, 1797 (Nudibranchia:  
526 Dendronotoidea). *Zoological Journal of the Linnean Society*, 113(1), 21–46.
- 527 Wägele, H. and Willan, R.C. (2000). Phylogeny of the Nudibranchia. *Zoological Journal of the Linnean Society*, 130, 83–  
528 181.
- 529 Wägele, H., Ballesteros, M. and Avila, C., (2006). Defensive glandular structures in opisthobranch molluscs – from  
530 histology to ecology. *Oceanography and Marine Biology*, 44, 197.
- 531 Wägele, H., Klussmann-Kolb, A., Verbeek, E. and Schrödl, M. 2014. Flashback and foreshadowing – a review of the  
532 taxon Opisthobranchia. *Organisms Diversity & Evolution*, 14(1), 133–149.
- 533 Wilson, N.G., Schrödl, M. and Halanych, K.M. (2009). Ocean barriers and glaciation: evidence for explosive radiation  
534 of mitochondrial lineages in the Antarctic sea slug *Doris kerguelenensis* (Mollusca, Nudibranchia). *Molecular*  
535 *Ecology*, 18(5), 965–984.
- 536 Wilson, N.G., Maschek, J.A. and Baker, B.J. (2013). A species flock driven by predation? Secondary metabolites support  
537 diversification of slugs in Antarctica. *PLoS ONE*, 8(11), e80277.
- 538 WoRMS Editorial Board (2018). World Register of Marine Species. Available from <http://www.marinespecies.org> at  
539 VLIZ. Accessed 2018-02-27.
- 540 Vicente, N. and Arnaud, P.M. (1974). Invertébrés marins des XIIeme et XVeme expéditions Antarctiques Françaises en  
541 Terre Adélie. 12. Gastéropodes Opisthobranches. *Tethys*, 5, 531–548.
- 542 Yang, Z. (1996). Among-site rate variation and its impact on phylogenetic analyses. *Trends in Ecology & Evolution*,  
543 11(9), 367–372.
- 544
- 545

546 **Figure captions**

547 **Fig. 1** Map of the Western Antarctic region showing the sampling stations of the ANT XV/3 (red circles) and the ANT  
548 XXI/2 cruises (yellow stars). Source: <http://www.simplemappr.net/#tabs=0>

549 **Fig. 2** Preserved specimen of *Tritonia challengeriana* from the eastern Weddell Sea. (A) Dorsal view. (B) Lateral view.  
550 (C) Ventral view. (D) Detail of the jaw ornaments (SEM). (E) Scanning electron microscopy (SEM) of the radula showing  
551 the tricuspidated rachidian teeth, the first and subsequent lateral teeth. (F) Schematic drawing of the reproductive system.  
552 *am*, ampulla; *cgl*, capsule gland; *mgl*, mucous gland; *re*, seminal receptacle; *vd*, vas deferens (G) Detail of the penial  
553 papilla (SEM).

554

555 **Fig. 3** Preserved specimen of *Tritonia dantarti* from Bouvet Island. (A) Dorsal view. (B) Lateral view. (C) Ventral view.  
556 (D) Detail of the jaw ornaments (SEM). (E) Scanning electron microscopy (SEM) of the radula showing the rachidian  
557 teeth, the first and subsequent lateral teeth. (F) Schematic drawing of the reproductive system. *am*, ampulla; *cgl*, capsule  
558 gland; *mgl*, mucous gland; *re*, seminal receptacle; *vd*, vas deferens (G) Detail of the penial papilla (SEM)

559

560 **Fig. 4** Phylogenetic tree of *Tritonia* species and outgroup species considered using Bayesian inference (BI) and maximum  
561 likelihood (ML) on the combined COI, 16S, and H3 datasets. Numbers on the nodes indicate posterior probability values  
562 (BI) and bootstrap support values (ML). The sequences generated in our lab are depicted in bold. The *T. dantarti* GenBank  
563 specimen placed in the red cluster is registered in GenBank as *T. antarctica*. (Voucher n. CASIZ171177). In the box, the  
564 results of the ABGD (green) and GMYC (purple) analyses are represented as bars, distinguishing the two SO species  
565 groups studied.

566

567 **Fig. 5** Gut content found in the intestine of the examined specimens. (A–C) Octocoral structures found in *Tritonia*  
568 *challengeriana*. (B) Alcyonarian sclerites and diatom found in *T. challengeriana*. (D–E) Alcyonarian spicules found in  
569 *T. dantarti*.

570

571 **Fig. 6** Underwater photographs of *Tritonia challengeriana* from its current range of distribution. (A) Puerto Raúl Marín  
572 Balmaceda, Chile (photograph by T. Heran). (B) Comau Fjord, Chile (photograph by D. Thompson). (C) Punta Porra,  
573 Chile (photograph by T. Heran). (D) Ross Sea, Antarctica (photograph by S. Harper) (E) Ross Sea, Antarctica (photograph  
574 by P. Brueggeman). (F) Antarctic Peninsula, Antarctica (photograph by G. Giribet).

575 **Fig. 7** *Tritonia dantarti* specimens from Bouvet Island (photographs by M. Ballesteros). **(A)** Two specimens collected a  
576 260 m of depth from Bouvet Island displaying whitish colouration (T14.3 and T14.4). **(B)** Specimen from Bouvet Island  
577 with orange colouration, collected at 130 m of depth (T15.1).

578

580 **Table 1.** Diagnostic characters of *Tritonia challengeriana*, *T. dantarti*, and *T. vorax* from this study and the literature. *n.r.* not reported.

|                                          | <i>T. challengeriana</i>            | <i>T. challengeriana</i>            | <i>T. dantarti</i>                 | <i>T. dantarti</i>                | <i>T. vorax</i>    |
|------------------------------------------|-------------------------------------|-------------------------------------|------------------------------------|-----------------------------------|--------------------|
| <b>Location</b>                          | Weddell Sea                         | Antarctic Peninsula,<br>Weddell Sea | Bouvet Island                      | Bouvet Island                     | South Georgia      |
| <b>Body size after preservation (mm)</b> | 21–42                               | 23–65                               | 18–23                              | 18–33                             | 22–60              |
| <b>Colouration</b>                       | Beige-brownish,<br>milky white      | White, yellow,<br>brown             | Beige, milky white                 | Bright orange, white              | White, pink, cream |
| <b>Dorsal mantle</b>                     | Smooth with<br>subepithelial knobs  | Warty                               | Smooth with<br>subepithelial knobs | With crests                       | Smooth             |
| <b>Oral lips</b>                         | Present                             | Present                             | Present                            | Present                           | Absent             |
| <b>Velum</b>                             | Not prominent,<br>sometimes bilobed | Sometimes bilobed                   | Prominent or not,<br>bilobed       | Wide, semitransparent,<br>bilobed | Bilobed            |
| <b>Num. of velar processes</b>           | 5–10                                | <15                                 | 9–19                               | <15                               | >15                |
| <b>Num. of gill clusters per side</b>    | 6–14                                | 6–30                                | 15–29                              | 20–33                             | 20–40              |
| <b>Size of gill clusters</b>             | Large or small                      | Small or medium                     | Large or small                     | Large or small                    | Tiny or small      |
| <b>Shape of gill clusters</b>            | Ramified or<br>dichotomous          | Digitated                           | Ramified, highly<br>digitated      | Highly ramified                   | Dichotomous        |
| <b>Salivary glands</b>                   | Thin, elongated                     | Long, ribbon-like                   | Large,<br>isodiametric             | Small, elongated                  | Long, ribbon-like  |

|                             |                                 |                               |                                                 |                                                                           |                                                                     |
|-----------------------------|---------------------------------|-------------------------------|-------------------------------------------------|---------------------------------------------------------------------------|---------------------------------------------------------------------|
| <b>Rachidian tooth</b>      | Broad, prominent monocuspidated | Broad, prominent central cusp | Broad, prominent monocuspidated                 | Broad, monocuspidated, central cusp and two lateral rounded protuberances | Broad, tricuspidated                                                |
| <b>Radular formula</b>      | 30–37 x (33–49).1.1.1.(33–49)   | 31–46 x (37–63).1.1.1.(37–63) | 36–37 x (43–46).1.1.1.(43–46)                   | 30–38 x (35–48).1.1.1.(35–48)                                             | 54–71 x (79–115).1.1.1.(79–115)                                     |
| <b>Jaw/body proportions</b> | length 0.21–0.3                 | 0.25                          | 0.25–0.28                                       | 0.27                                                                      | >0.4                                                                |
| <b>Jaw ornaments</b>        | Conical, striated, hooked       | Conical, striated             | Conical, striated, hooked                       | Conical, slightly curved                                                  | Conical, striated                                                   |
| <b>Penis</b>                | Flagellated and/or conical      | Digitiform to conical         | Thin, flagellated and/or conical                | n.r.                                                                      | Digitiform to conical                                               |
| <b>Gut contents</b>         | Alcyonarian spicules, diatoms   | <i>Cephalodiscus</i>          | Alcyonarian spicules, diatoms, octocoral polyps | n.r.                                                                      | Alcyonarian species, amphipods ( <i>Gammaropsis</i> ), tanaidaceans |
| <b>Reference</b>            | This study                      | Wägele, 1995; Schrödl, 2003   | This study                                      | Ballesteros and Avila, 2006                                               | Wägele, 1995                                                        |

581

582

583

584 **Table 2.** Kimura two-parameter distances (K2P) between and within groups for the putative species of *Tritonia* included in our analyses; *n.c.* non-  
 585 computable since there was a single sequence available.

| Between groups |                          |           |           |           |           |           |           |           |           | Within groups |   |          |
|----------------|--------------------------|-----------|-----------|-----------|-----------|-----------|-----------|-----------|-----------|---------------|---|----------|
|                | 1                        | 2         | 3         | 4         | 5         | 6         | 7         | 8         | 9         |               |   |          |
| 1              | <i>T. challengeriana</i> |           |           |           |           |           |           |           |           |               | 1 | 0–1.5    |
| 2              | <i>T. dantarti</i>       | 7.9–14    |           |           |           |           |           |           |           |               | 2 | 0–0.01.9 |
| 3              | <i>T. festiva</i>        | 12.6–20.5 | 17.7–19   |           |           |           |           |           |           |               | 3 | 0–0.13.4 |
| 4              | <i>T. hamnerorum</i>     | 11.1–18.1 | 18.4–20   | 21.1–21.3 |           |           |           |           |           |               | 4 | n.c      |
| 5              | <i>T. hombergii</i>      | 12.5–22.3 | 20.5–22.5 | 18.7–19.1 | 22.7      |           |           |           |           |               | 5 | n.c      |
| 6              | <i>T. nilsodnheri</i>    | 8.9–22.5  | 11.4–21.6 | 11.1–21   | 9.2–16.8  | 10– 21.3  |           |           |           |               | 6 | 0–2      |
| 7              | <i>T. pickensi</i>       | 19.4–25.7 | 22.6–24.1 | 21.1–21.3 | 17.2      | 21.7      | 10.1–20.5 |           |           |               | 7 | n.c.     |
| 8              | <i>T. plebeia</i>        | 12.4–22.6 | 21.7–23.3 | 21.4–22.3 | 20.2–20.6 | 23.5–23.9 | 9.1–18.9  | 19.9–20.8 |           |               | 8 | 0.1–7    |
| 9              | <i>T. striata</i>        | 13.4–23.6 | 21.2–23   | 20.1–20.3 | 21.3      | 24        | 10–20.6   | 21.9      | 15.6–21.9 | 16.6          | 9 | 0.00     |

586



1 **Figures**

2

3 **Orange is the new white: taxonomic revision of Antarctic *Tritonia* species (Gastropoda: Nudibranchia)**

4 Maria Eleonora Rossi<sup>1,2,\*</sup>: [m.eleonora.rossi@gmail.com](mailto:m.eleonora.rossi@gmail.com) | [orcid.org/0000-0002-4076-5601](https://orcid.org/0000-0002-4076-5601)

5 Conxita Avilas: [conxita.avila@ub.edu](mailto:conxita.avila@ub.edu); [orcid.org/0000-0002-5489-8376](https://orcid.org/0000-0002-5489-8376)

6 Juan Moles<sup>4</sup>: [moles.sanchez@gmail.com](mailto:moles.sanchez@gmail.com) / [jmoles@g.harvard.edu](mailto:jmoles@g.harvard.edu) | [orcid.org/0000-0003-4511-4055](https://orcid.org/0000-0003-4511-4055)

7 <sup>1</sup>*Life Sciences Department, The Natural History Museum, Cromwell Road, London SW7 5BD, UK*

8 <sup>2</sup>*School of Biological Sciences, University of Bristol, Life Science Building, 24 Tyndall Ave, Bristol BS8 1TH, UK*

9 <sup>3</sup>*Department of Evolutionary Biology, Ecology, and Environmental Sciences, Faculty of Biology, and Biodiversity Research Institute (IRBio),*

10 *University of Barcelona, 643 Diagonal Av., 08028 Barcelona, Catalonia*

11 <sup>4</sup>*Museum of Comparative Zoology & Department of Organismic and Evolutionary Biology, Harvard University, 26 Oxford Street, Cambridge, MA*

12 *02138, USA*

13

14 \*Corresponding author

15 Running title: Antarctic *Tritonia* taxonomy

16

17

18

19

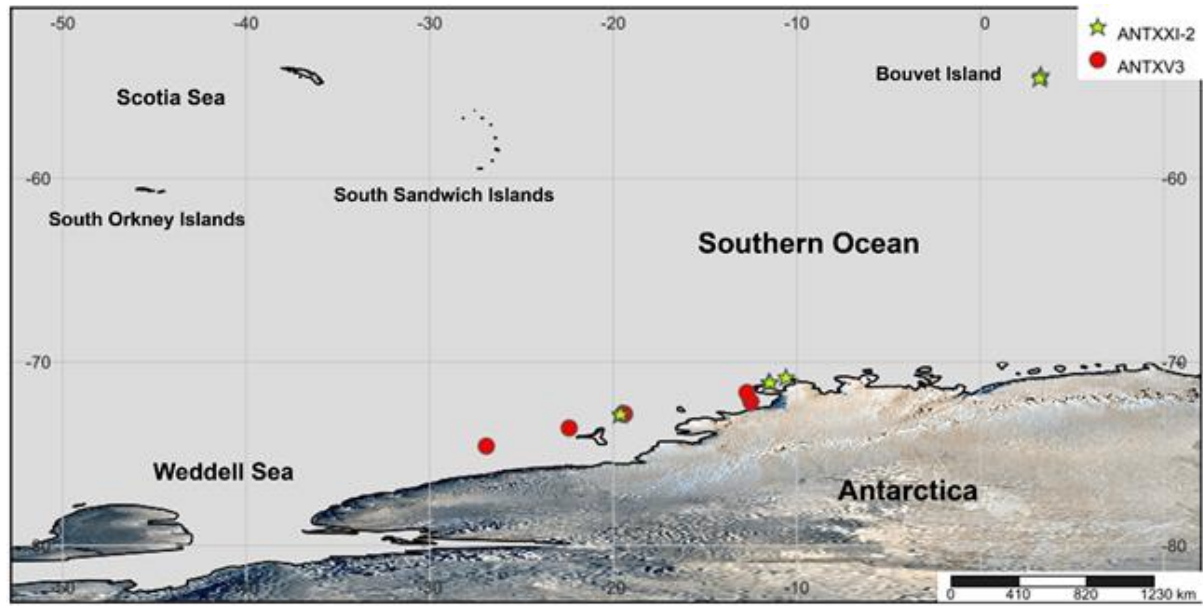

20

21 Fig. 1

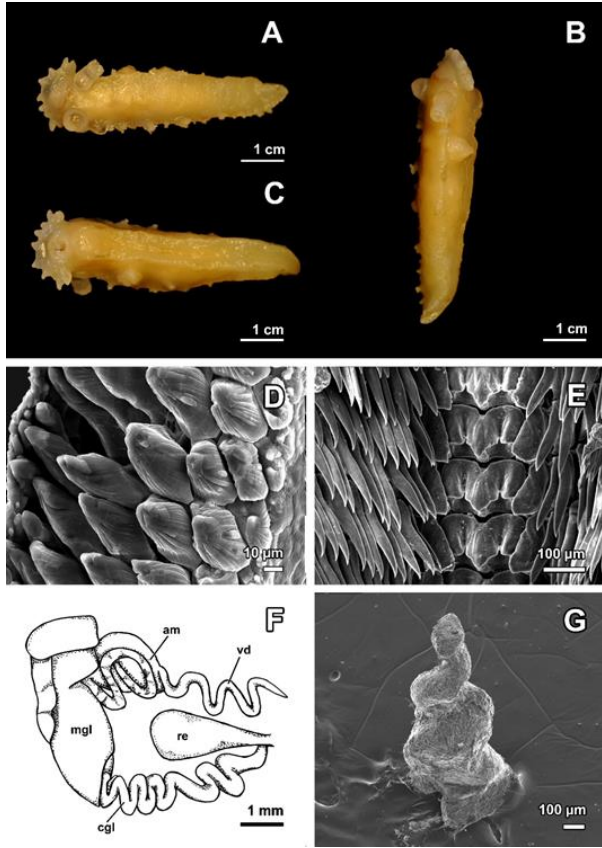

22

23 Fig. 2

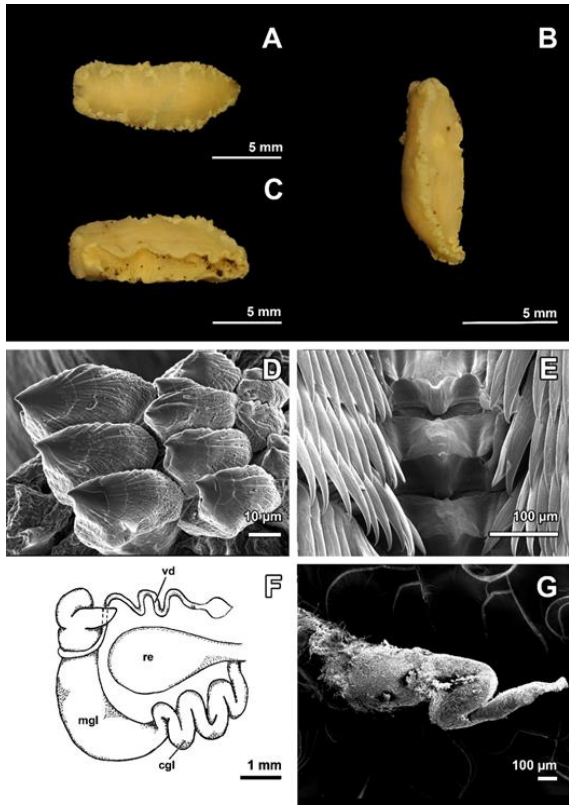

24

25

26 Fig. 3

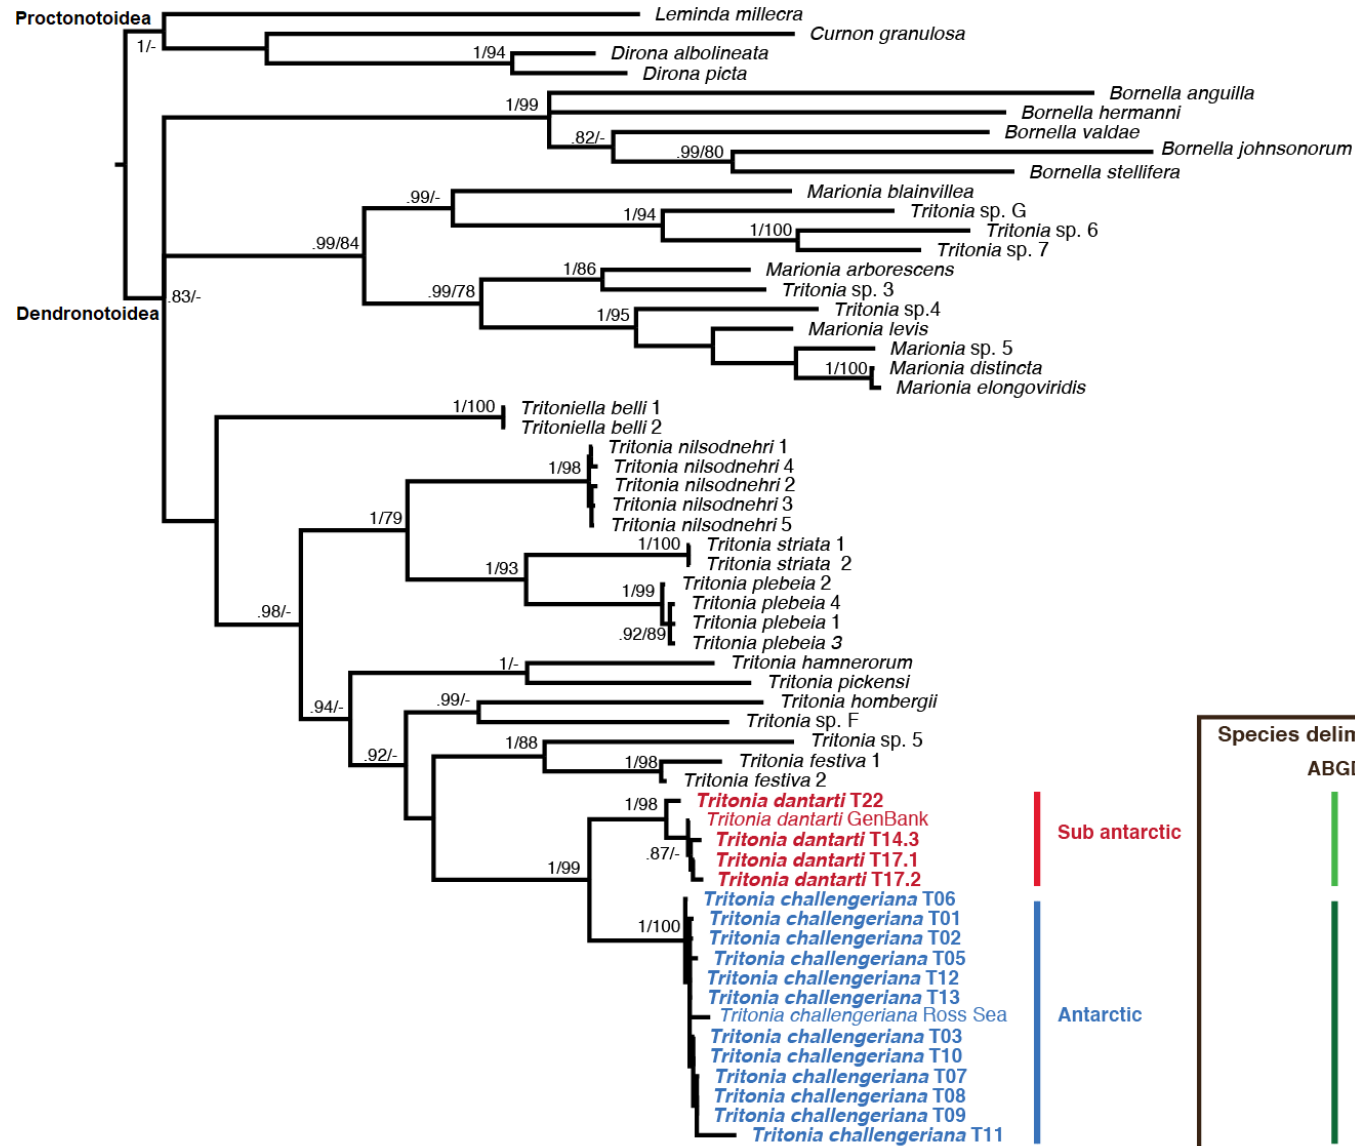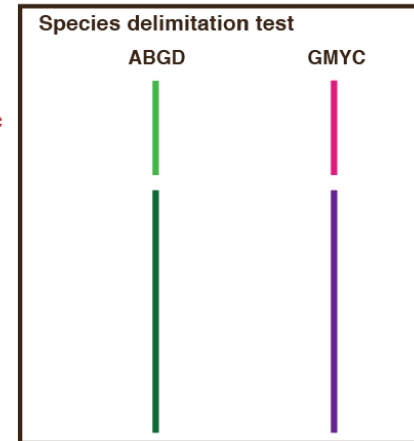

27

28 Fig. 4

29

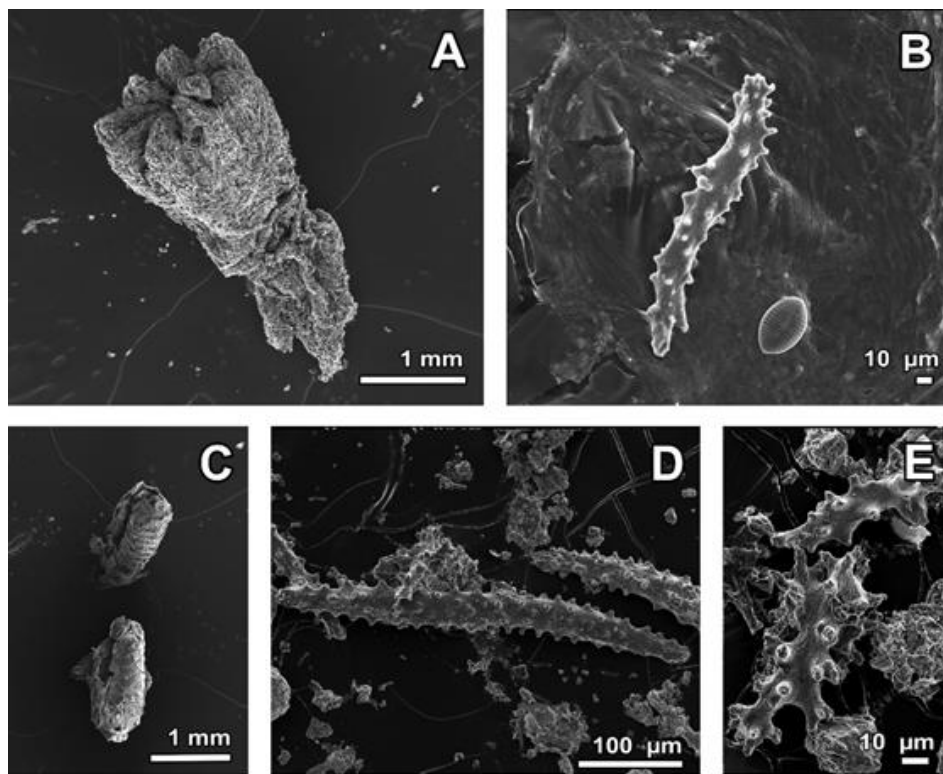

30

31

Fig. 5

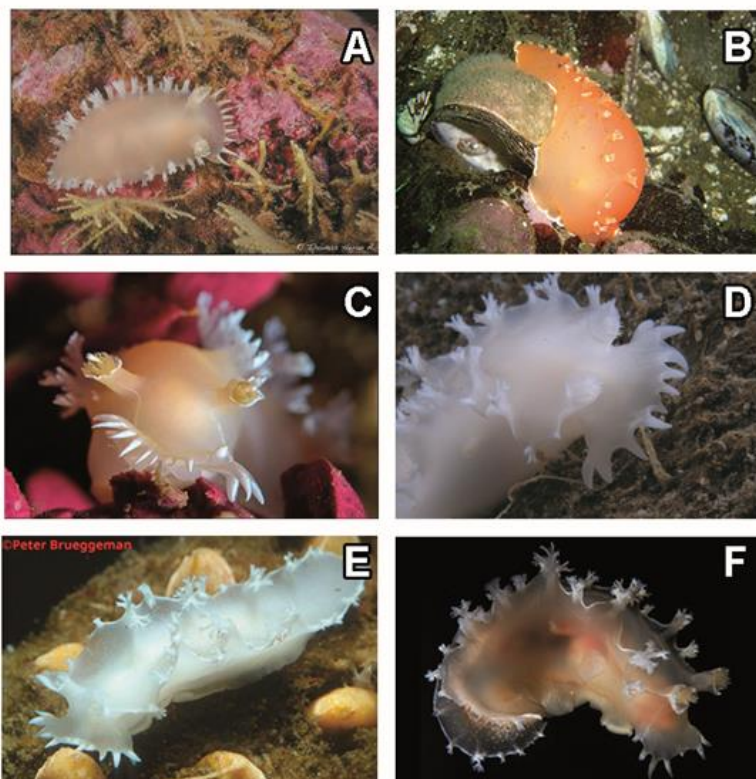

32

33

Fig. 6

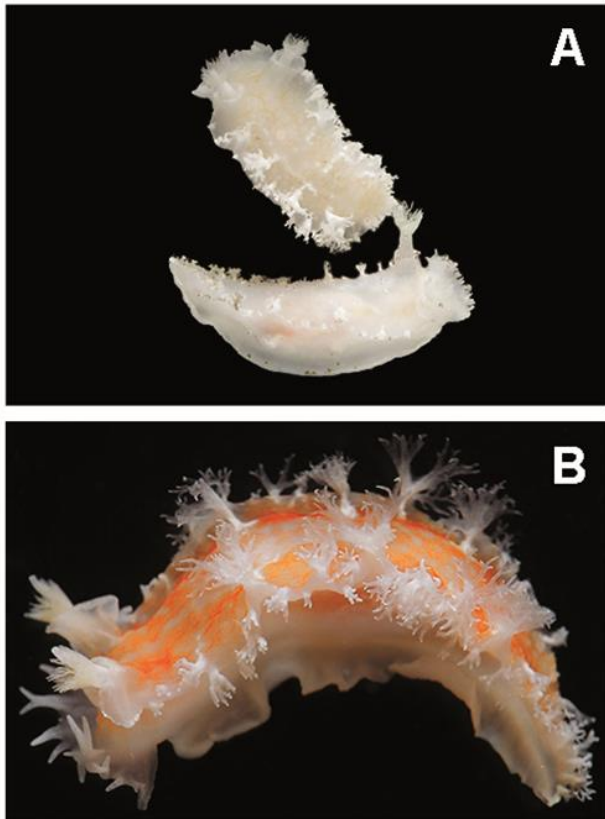

34  
35 Fig. 7
